# Supplementary material for: Advances in regenerative medicine applications of tetrahedral framework nucleic acid-based nanomaterials: an expert consensus recommendation
Source: PubMed Central journal article supplement (PMC9622686; doi:10.1038/s41368-022-00199-9), 2022-10-31
Supplement: 41368_2022_199_MOESM7_ESM.pdf [file 41368_2022_199_MOESM7_ESM.pdf]

**Tetrahedral framework nucleic acids promote scarless healing of cutaneous wounds via the AKT-signaling pathway**

**SPRINGER NATURE**

**Author:** Junyao Zhu et al

**Publication:** Signal Transduction and Targeted Therapy

**Publisher:** Springer Nature

**Date:** Jul 17, 2020

*Copyright © 2020, The Author(s)*

**Creative Commons**

This is an open access article distributed under the terms of the [Creative Commons CC BY](#) license, which permits unrestricted use, distribution, and reproduction in any medium, provided the original work is properly cited.

You are not required to obtain permission to reuse this article.

To request permission for a type of use not listed, please contact [Springer Nature](#)
