# Supplementary material for: Advances in regenerative medicine applications of tetrahedral framework nucleic acid-based nanomaterials: an expert consensus recommendation
Source: PubMed Central journal article supplement (PMC9622686; doi:10.1038/s41368-022-00199-9), 2022-10-31
Supplement: 41368_2022_199_MOESM8_ESM.pdf [file 41368_2022_199_MOESM8_ESM.pdf]

**Multi-targeted Antisense Oligonucleotide Delivery by a Framework Nucleic Acid for Inhibiting Biofilm Formation and Virulence**

**SPRINGER NATURE**

**Author:** Yuxin Zhang et al

**Publication:** Nano-Micro Letters

**Publisher:** Springer Nature

**Date:** Mar 17, 2020

*Copyright © 2020, The Author(s)*

**Creative Commons**

This is an open access article distributed under the terms of the [Creative Commons CC BY](#) license, which permits unrestricted use, distribution, and reproduction in any medium, provided the original work is properly cited.

You are not required to obtain permission to reuse this article.

To request permission for a type of use not listed, please contact [Springer Nature](#)
